# Supplementary material for: Pro-Myogenic Environment Promoted by the Synergistic Effect of Conductive Polymer Nanocomposites Combined with Extracellular Zinc Ions
Source: MDPI journal article supplement (doi:10.3390/biology11121706), 2022-11-25
Supplement: s1 [file s1]

# **Pro-myogenic environment promoted by the synergistic effect of conductive polymer nanocomposites combined with extracellular zinc ions**

J.L. Aparicio-Collado<sup>1</sup>, J. Molina-Mateo<sup>1</sup>, C. Torregrosa Cabanilles<sup>1</sup>, A. Vidaurre<sup>1,3</sup>,  
Beatriz Salesa<sup>4</sup>, A. Serrano-Aroca<sup>4,\*</sup>, R. Sabater i Serra<sup>1,2,3,\*</sup>

<sup>1</sup> Centre for Biomaterials and Tissue Engineering, Universitat Politècnica de València,  
46022 Valencia, Spain

<sup>2</sup>Department of Electrical Engineering, Universitat Politècnica de València, 46022 Valencia,  
Spain

<sup>3</sup>Biomedical Research Networking Centre in Bioengineering, Biomaterials and Nanomedicine  
(CI-BER-BBN), 46022 Valencia, Spain

<sup>4</sup> Biomaterials and Bioengineering Lab, Centro de Investigación Traslacional San Alberto Magno,  
Universidad Católica de Valencia San Vicente Mártir, 46001 Valencia, Spain

**\*Correspondence:** Roser Sabater i Serra (rsabater@die.upv.es) and Ángel Serrano-Aroca (angel.serrano@ucv.es)

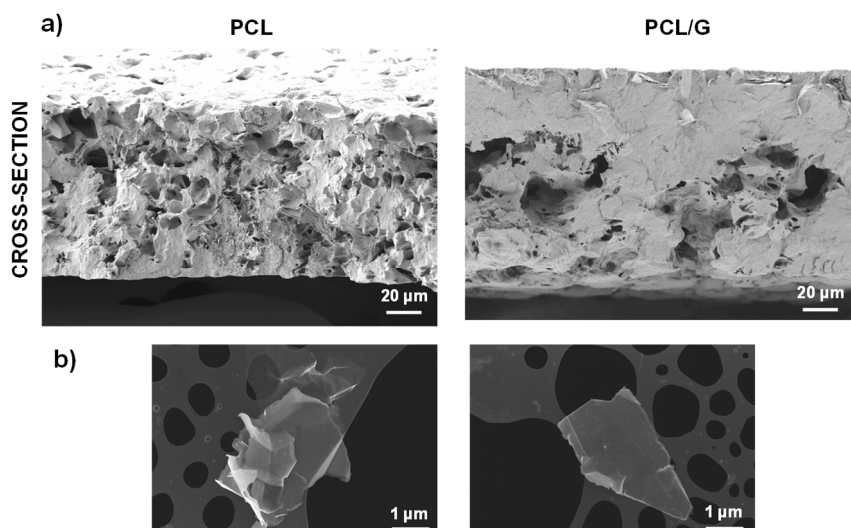

**Figure S1.** (a) Cross-section of neat PCL and nanocomposites with 0.7 wt% of G nanosheets (PCL/G). (b) HRFSEM representative images of pristine graphene nanosheets (aggregated and single form) previously dispersed in THF.

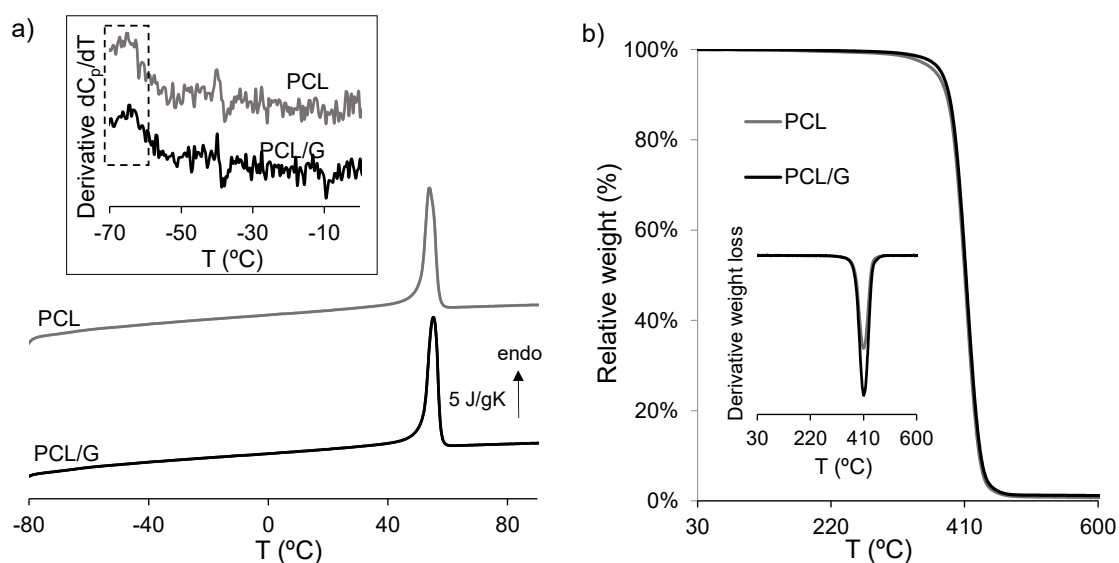

**Figure S2.** (a) Differential scanning calorimetry (DSC) thermograms of neat PCL and PCL/G nanocomposites. Normalized heat flow ( $C_p$ ) (2<sup>nd</sup> scan, heating). Inset: temperature derivative of the heat capacity ( $dC_p/dT$ ) from -70 to 0 °C; the dotted lines indicate the glass transition process. (b) Thermogravimetry results (TGA). Relative weight loss of PCL and PCL/G nanocomposites. Inset: derivative of weight loss.

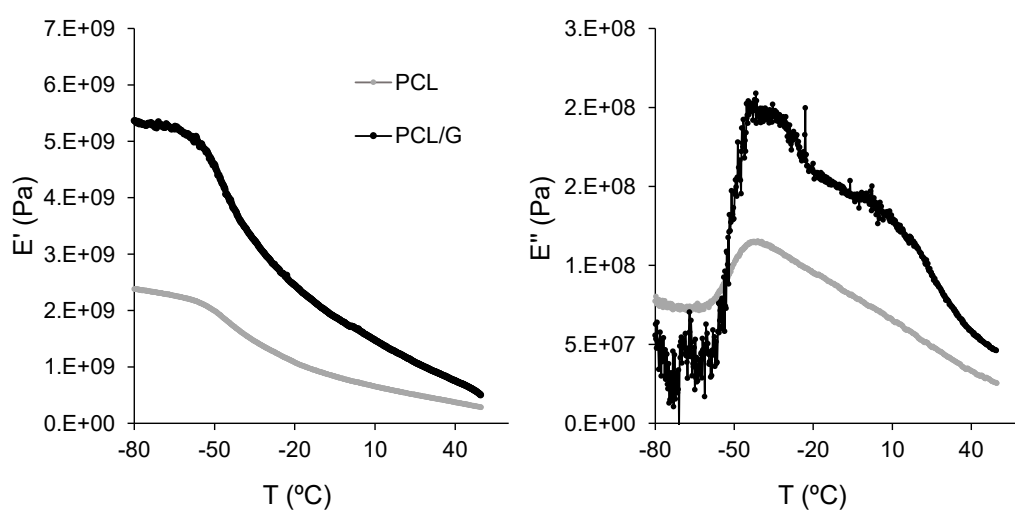

**Figure S3.** Dynamic mechanical thermal analysis (DMTA traction assay).  $E'$  and  $E''$  vs. temperature at 1 Hz.
